# Supplementary material for: Racemic metal phosphonates based on 1-phosphonomethyl-2-benzimidazol-piperidine
Source: Royal Society of Chemistry journal article supplement (doi:10.1039/c3ce41642a), 2013-01-01
Supplement: c3ce41642a.pdf [file c3ce41642a.pdf]

## Supporting Information

### Racemic metal phosphonates based on 1-phosphonomethyl-2-benzimidazol-piperidine

Hui Zhu, Jian Huang, Song-Song Bao, Min Ren and Li-Min Zheng\*

**Table S1.** Hydrogen bond lengths (Å) and angles (°) for **1**.

| D-H...A         | d(D-H) | d(D..A)  | <DHA  |
|-----------------|--------|----------|-------|
| O3W-H3WB...O3   | 0.850  | 2.728(3) | 134.1 |
| O2W-H2WA...O3W  | 0.850  | 2.681(3) | 161.5 |
| O2W-H2WB...O3A  | 0.850  | 2.712(3) | 146.1 |
| O4W-H4WB...O1C  | 0.850  | 2.894(3) | 168.4 |
| O3W-H3WA...O3D  | 0.850  | 2.806(3) | 135.9 |
| O1W-H1WA...O4WE | 0.850  | 2.784(3) | 146.3 |
| N3-H3C...O6WF   | 0.850  | 2.852(5) | 142.2 |
| O4W-H4WA...O2WG | 0.850  | 2.837(3) | 168.4 |
| O6W-H6WA...O4WG | 0.850  | 2.859(5) | 132.8 |
| O6W-H6WB...N2H  | 0.850  | 3.266(5) | 160.8 |

Symmetry codes: A: x+1, y, z; B: x-1, y, z; C: x+1, y-1, z; D: -x, -y+1, -z+1; E: x, y+1, z; F: x, y, z-1; G: -x+1, -y+1, -z+1; H: -x+1, -y+2, -z+1.

**Table S2.** Hydrogen bond lengths (Å) and angles (°) for **3**.

| D-H...A        | d(D-H) | d(D..A)  | <DHA   |
|----------------|--------|----------|--------|
| O1W-H1X...O3C  | 0.850  | 2.971(6) | 118.00 |
| O1W-H1Y...O2WD | 0.850  | 2.954(6) | 111.00 |
| O2W-H2X...O1WD | 0.860  | 2.954(6) | 109.00 |
| O2W-H2Y...O2E  | 0.840  | 2.761(7) | 140.00 |
| N3-H3C...O2F   | 0.860  | 2.692(6) | 159.00 |

Symmetry codes: C: x, 1+y, z; D: -x, 1-y, 1-z; E: 1-x, 1/2+y, 3/2-z; F: 1-x, -y, 1-z.

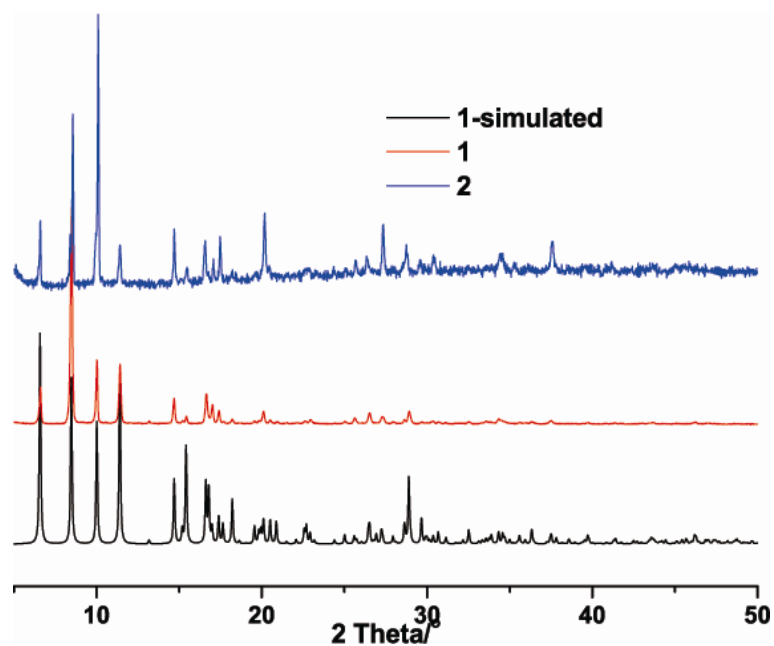

**Fig. S1** Powder XRD patterns for compounds **1**, **2** and **1-simulated** from single crystal data.

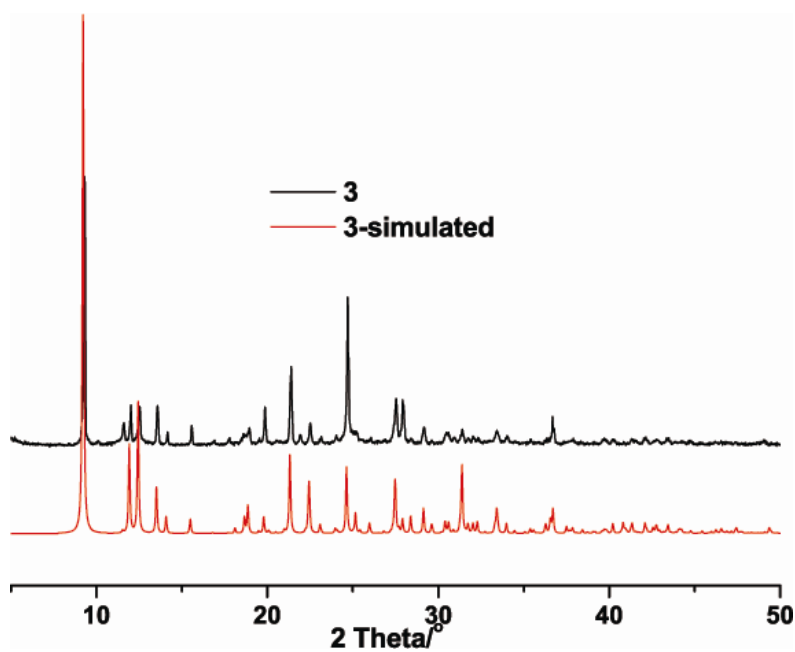

**Fig. S2** Powder XRD patterns for compound **3** and **3-simulated** from single crystal data.

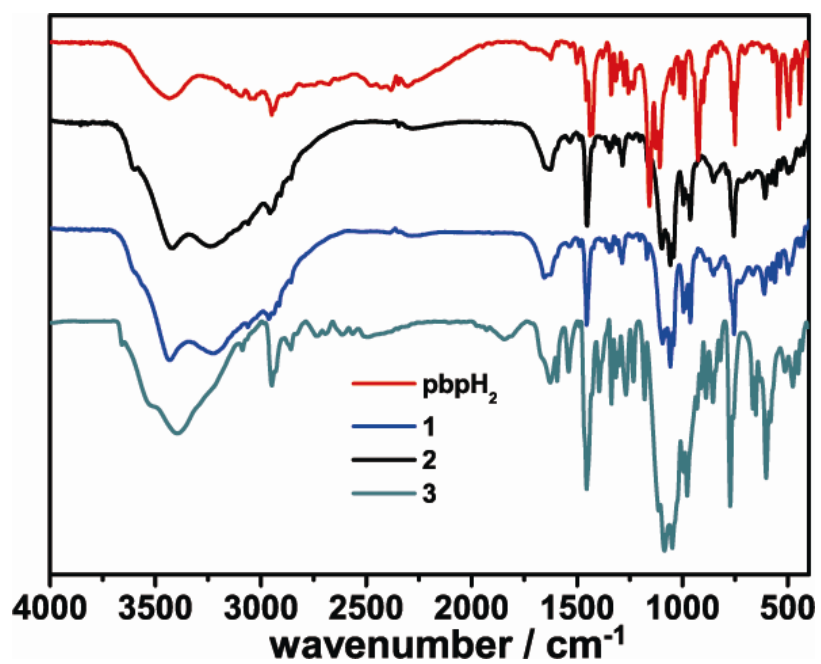

Fig. S3. The IR spectra of compounds 1- 3.

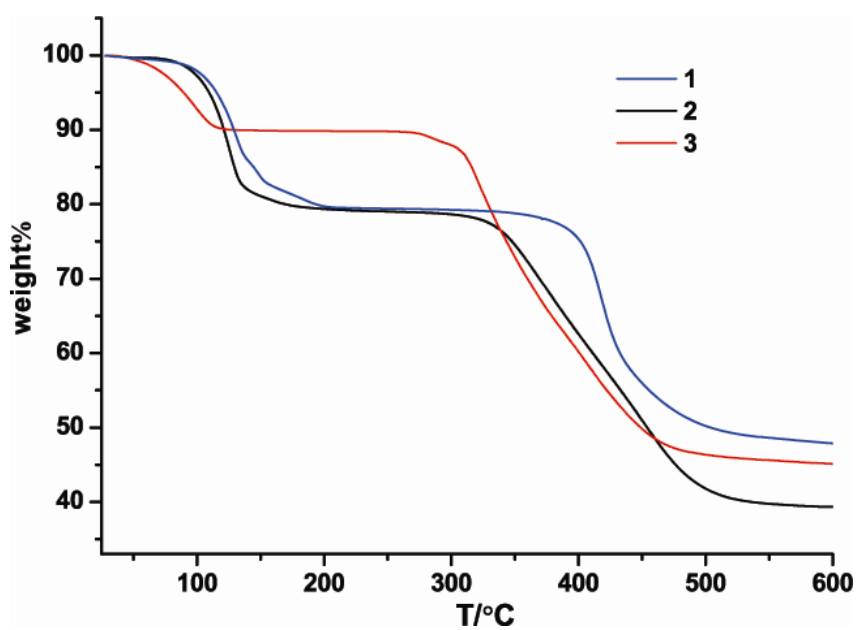

Fig. S4. Thermal analyses of compounds 1-3.

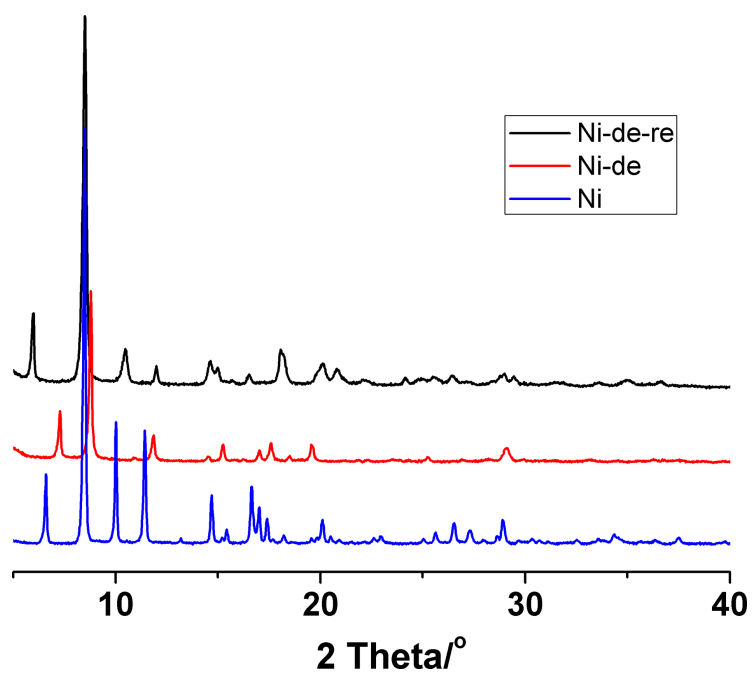

**Fig. S5.** Powder XRD patterns for compound **1** before dehydration (blue), after dehydration (red) and rehydration (black).

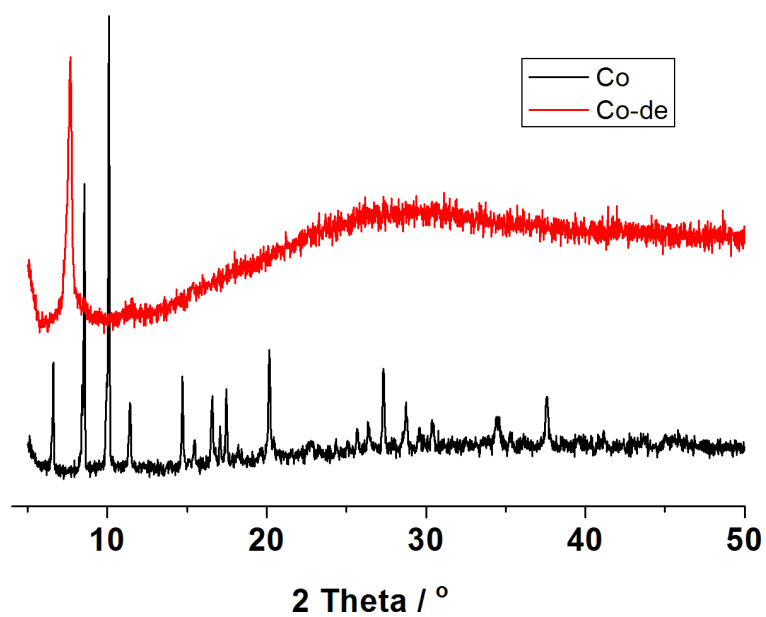

**Fig. S6.** Powder XRD patterns for compound **2** before dehydration (black), and after dehydration (red).

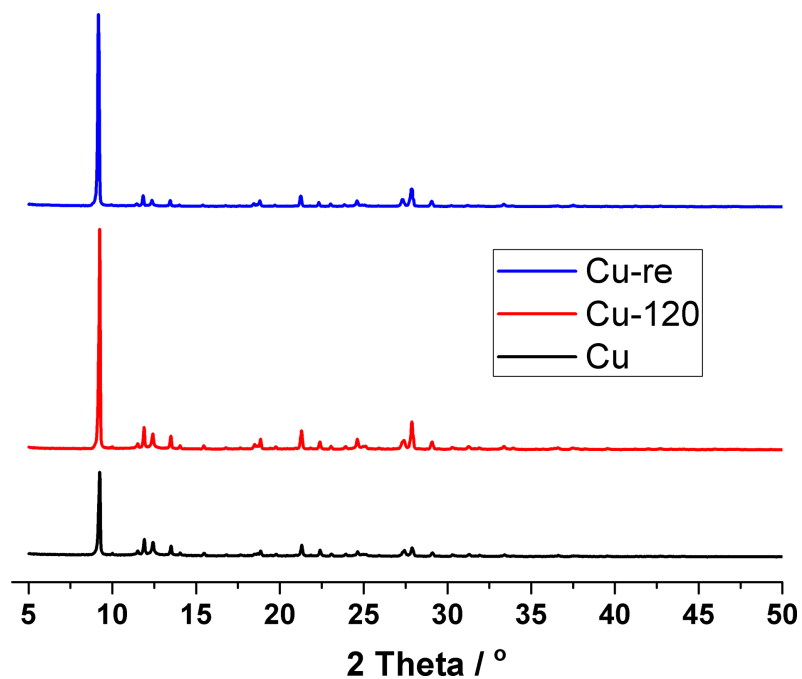

**Fig. S7.** Powder XRD patterns for compound **3** before dehydration (black), after dehydration (red) and rehydration (blue).

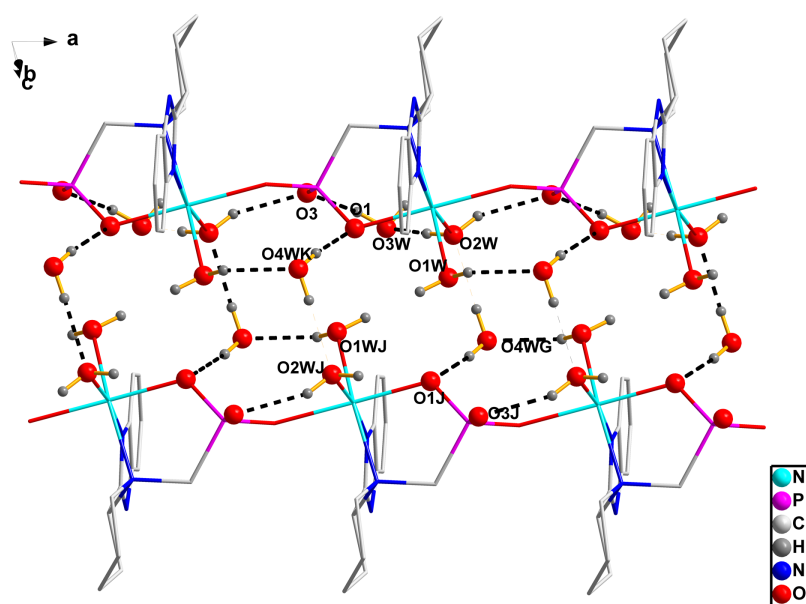

**Fig. S8.** The supramolecular double-chain in structure **1**. The hydrogen bond interactions are highlighted with dotted lines.

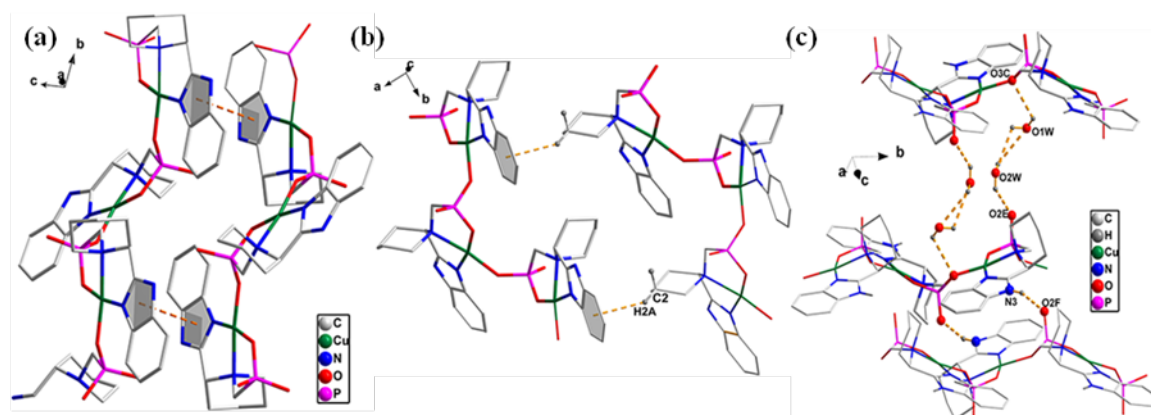

**Fig. S9.** (a) The inter-chain  $\pi$ - $\pi$  stacking in structure **3** along the  $c$ -axis. (b) The C-H  $\cdots$   $\pi$  interactions along the  $a$ -axis. (c) The hydrogen bond interactions between the chains are highlighted with dotted lines. Symmetry codes: A:  $1-x, y-0.5, 0.5-z$ ; C:  $x, 1+y, z$ ; D:  $-x, 1-y, 1-z$ ; E:  $1-x, 1/2+y, 3/2-z$ ; F:  $1-x, -y, 1-z$ .

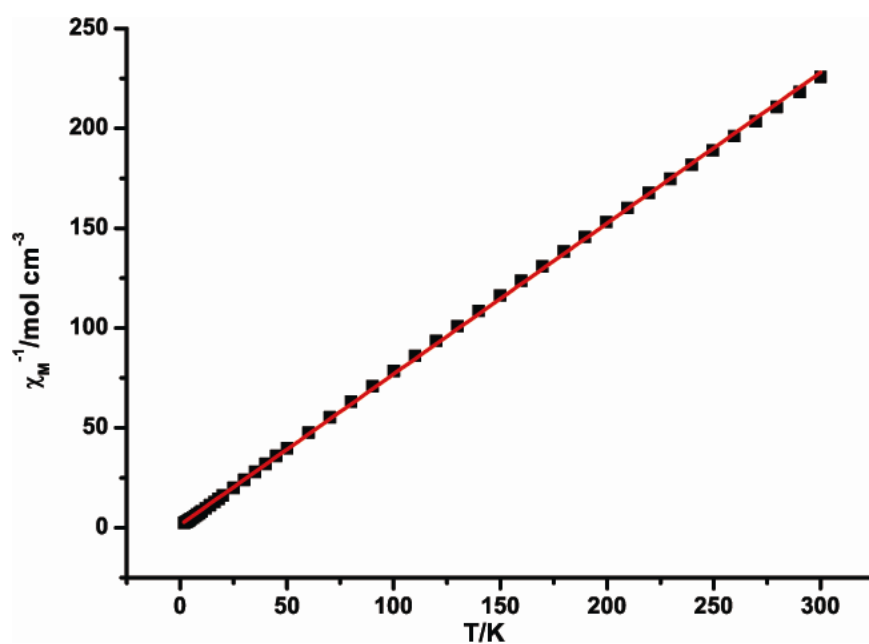

**Fig. S10** Plot of the temperature dependence of  $1/\chi_M$  for compound **1**.

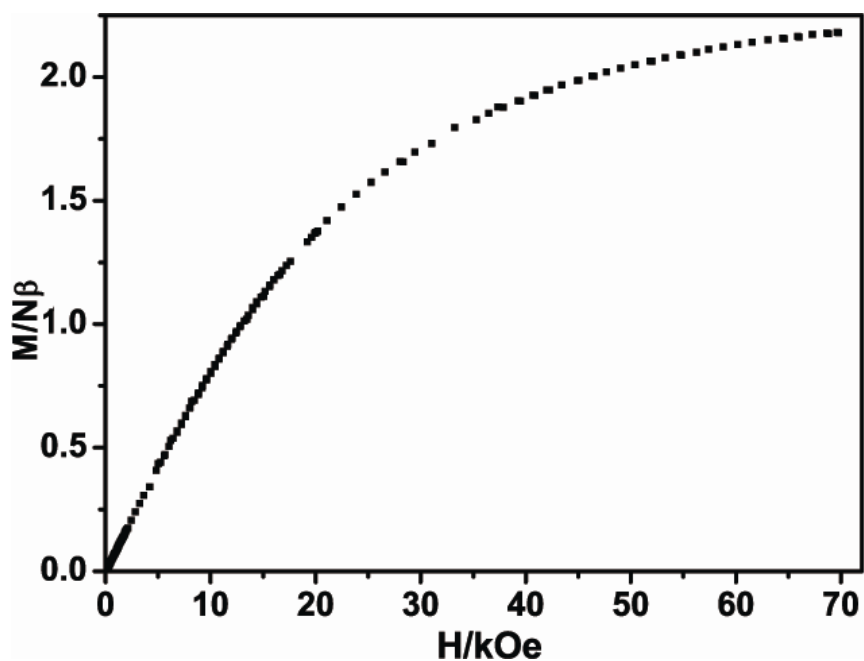

**Fig. S11.** The  $M$  vs.  $H$  plot for **1** measured at 1.8 K

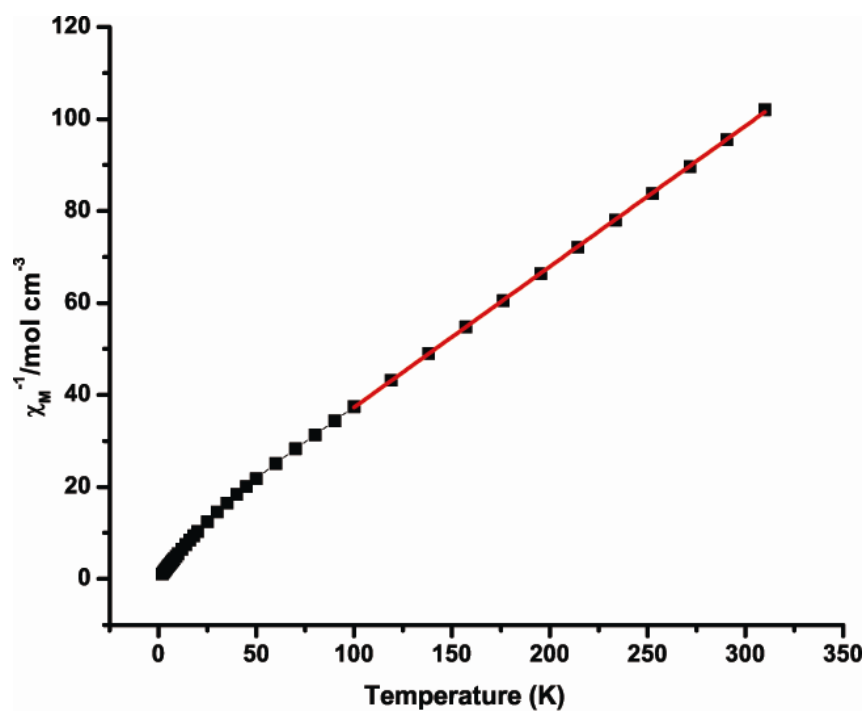

**Fig. S12** Plot of the temperature dependence of  $1/\chi_M$  for compound **2**.

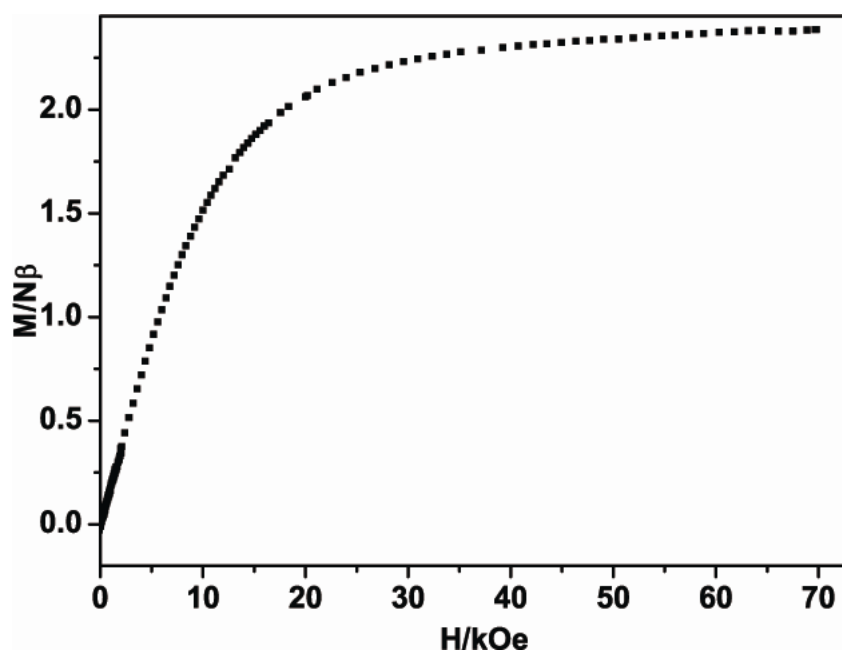

**Fig. S13.** The  $M$  vs.  $H$  plot for **2** measured at 1.8 K

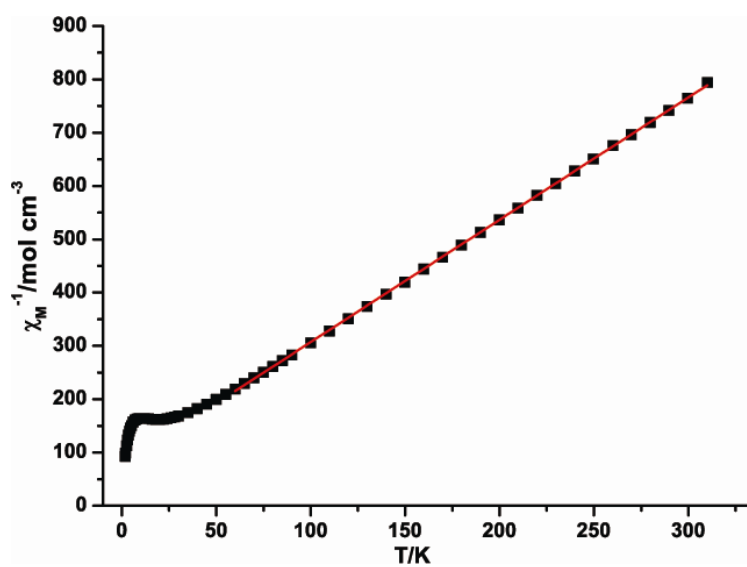

**Fig. S14** Plot of the temperature dependence of  $1/\chi_M$  for compound **3**.



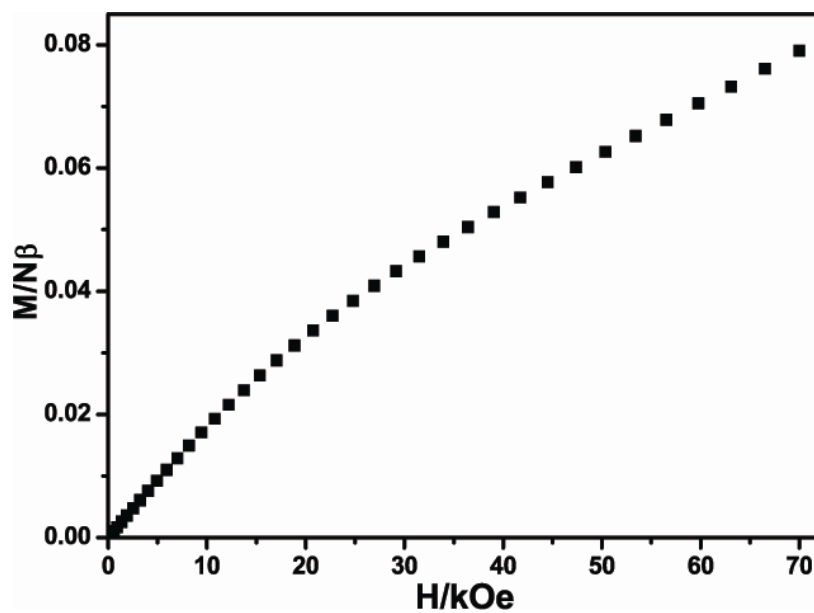

**Fig. S15.** The  $M$  vs.  $H$  plot for **3** measured at 1.8 K.
